# Supplementary material for: Applying a modified systematic review and integrated assessment framework (SYRINA) – a case study on triphenyl phosphate
Source: Environ Sci Process Impacts. 2023 Dec 26;26(2):380–99. doi: 10.1039/d3em00353a (PMC10879963; doi:10.1039/d3em00353a)
Supplement: EM-026-D3EM00353A-s002 [file EM-026-D3EM00353A-s002.xlsx]

## Sheet: Adverse outcomes Epi
Outcome group	Study	Study population/species and exposure age/lifestage	Sex	N	Country	Outcome	Endpoints	Trend	Significant? (p<0.05)	Study confidence	Summary	Initial confidence	Downgrade	Upgrade	Final confidence rating for Outcome group
Male reproductive system	Meeker et al. 2010	Adulthood (mean 36.5 years; range 28-46 years)	Male	50	United States	Sperm quality	Sperm concentration	decrease	yes	Low confidence	Significant decrease of sperm concentration with increasing TPHP in dust. Decrease of sperm motility and morphology parameters not significant.	Medium	- Methodological quality - Imprecise and sparse data		Low
							Sperm motility	decrease	no
							Sperm morphology	decrease	no
	Soubry et al. 2017	Adulthood (18-35 years)	Male	67	United States	Sperm quality	Motility	Increase	no	Medium confidence
							Total sperm count	decrease	no
Neurodevelopment	Castorina et al. 2017	Children at 7 years of age	Male & Female	310	United States	Cognitive development	Full-scale IQ	decrease	no	Medium confidence	Significant decrease in working memory (p<0.05) of children with increasing maternal DPHP concentration in urine. No significant effects on behaviour of children, mothers reported a small decrease of all scores, teachers a small increase.	Medium	- Imprecise and sparse data		Low
							Working memory	decrease	yes
							Perceptual reasoning	decrease	no
							Verbal comprehension	decrease	no
							Processing speed	decrease	no
						Behaviour	ADHD Index	no change	no
							Inattention DSM-IV	no change	no
							Hyperactive/impulse DSM-IV	no change	no
							Total subscale DSM-IV	no change	no
							Hyperactivity scale,	no change	no
							Attention problems scale	no change	no
Immune system	Canbaz et al. 2016	Children at 4 and 8 years	Male	220	Sweden	Asthma	Males	decrease	yes	Medium confidence	Higher concentrations of dust TPHP in control group for all subgroup analyses, except for persistent asthma subgroup. However, results were not significant.	Medium	- imprecise or sparse data		Low
			Females				Females	decrease	no
							Sensitized	decrease	yes
							Non-sensitized	decrease	no
							Transient asthma	decrease	yes
							Late onset asthma	decrease	yes
							Persistent asthma	increase	no

## Sheet: Adverse outcomes in vivo Mammal
Outcome group	Study	Species/Strain (Exposure lifestage)	Sex	Exposure route/duration	Endpoint	N per treatment	Trend	Significant from control? (p<0.05)	NOEL	LOEL	Study confidence	Summary	Initial confidence	Downgrade	Upgrade	Final confidence rating for Outcome group	Outcome group
Male reproductive system	Chen et al., 2015	ICR Mice (Developmental)	Male	Oral diet (5wk)	Testis weight	7	decrease	yes	control	100 mg/kg bw/day	Low confidence	Significant decrease of testis weight and semiferous tubules. No significant effects on anogenital index.	High	- Limitations in methodological quality - Imprecise or sparse data		Low	Male reproductive system
					Testicular histology (semiferous tubules numbers)		decrease	yes	100 mg/kg bw/day	300 mg/kg bw/day
	Philbrook et al., 2018	C57Bl/6 Mice (Developmental)	Male	Parental (6d)	Anogenital index	10	no change	no	-	-	Medium confidence
Female reproductive system	Philbrook et al., 2018	C57Bl/6 Mice (Adult (gestation))	Female	Intraperitoneal injection (6d)	Ovary weight	10	no change	no	-	-	Medium confidence	No changes in ovary weight, anogenital index or uterine weight.	High	- Imprecise or sparse data		Medium	Female reproductive system
					Anogenital index		no change	no	-	-
	Wang et al., 2018	ICR Mice (Adult)	Female	Subcutaneous injection (3d)	Uterotrophic bioassay, uterine weight	8	no change	no	-	-	Medium confidence
Reproductive function	Green et al. 2017	Rat (Adult)	Female	Oral diet (35d)	Gestation length and litter size	8	no trend	no	-	-	High confidence	No significant effects in rats, however, sexes per litter, implantation efficiency, fetus viability, number of implants were found to decrease slightly. Also, sex distribution was leaning towards slightly more males. In mice, litter size decrease and % of resorptions in litter increase in a non-significant way. Increase of placental weight in female mice but only at one concentration.	High	- Imprecise or sparse data		Medium	Reproductive function
				Parental (35d)	Females per litter		no trend	no	-	-
			Male	Parental (35d)	Males per litter		decrease	no	-	-
	Philbrook et al., 2018	C57Bl/6 Mice (Adult (gestation))	Female	Parental (6d)	Placental weights	10	increase, then decrease	only at 25 mg/kg			Medium confidence
		C57Bl/6 Mice (Developmental)	Combined	Parental (6d)	% resorptions in litter	10	increase	no
		C57Bl/6 Mice (Developmental)	Combined	Parental (6d)	Litter size and % resorptions in litter	10	decrease	no	-	-	Medium confidence
	Welsh et al., 1987	Sprague-Dawley Rats (Adult)	Female	Oral diet (91d)	Implantation efficiency (%), fetus viability, implants per female	29-38	decrease	no	-	-	Medium confidence
					Corpora lutea (per female)		no change	no	-	-
		Sprague-Dawley Rats (Developmental)	Combined	Parental (20d)	Sex distribution, male/female ratio	175-260	increase	no	-	-
Neurodevelopment	Sobotka et al., 1986	Sprague-Dawley Rats (Adult)	Male	Diet (4mon)	Neuromotor behaviour	10	no clear pattern	no	-	-	Low confidence	In rats, no effects on neuromotor behaviour was seen.	High	- Limitations in methodological quality - Imprecise or spare data		Low	Neurodevelopment
Metabolism	Chen et al., 2015	ICR Mice (Developmental)	Male	Oral diet (5wk)	Liver weight	7	decrease	yes	100 mg/kg bw/day	300 mg/kg bw/day	Low confidence	Significant increase of mesenteric (male and female), inguinal and gonadal (male) fat deposits. Significant decrease in diabetes-free weight-matched male mice and significant increase in energy intake of females (males were also increased but not significant).	High	- Imprecise or sparse data		Medium	Metabolism
	Green et al. 2017	Rat (Adult)	Female	Parental (35d)	Cumulative energy intake, relative weight of brown, gonadal, inguinal and mesenteric fat deposite	8	mostly increase	yes	control	170 µg/d	High confidence
			Male		Cumulative energy intake, relative weight of brown, gonadal, inguinal and mesenteric fat deposite		mostly increase	yes	control	170 µg/d
					T2DM incidence (% diabetes free)		decrease	yes	control	170 µg/d
	Philbrook et al., 2018	C57Bl/6 Mice (Adult (gestation))	Female	Intraperitoneal injection (6d)	Kidney and liver weight	10	no change	no	-	-	Medium confidence
Immune system	Hinton et al., 1987	Sprague-Dawley Rat (Developmental)	Female	Oral diet (4mon)	Spleen and thymus weight, midterm, final, immunized	5-10	no clear pattern	no	-	-	Low confidence	No significant effects on the weight of spleen or thymus.	High	- Imprecise or sparse data		Medium	Immune system
			Male		Spleen and thymus weight, midterm, final, immunized		no clear pattern	no	-	-
	Philbrook et al., 2018	C57Bl/6 Mice (Adult (gestation))	Female	Intraperitoneal injection (6d)	Spleen and thymus weight	10	no change	no	-	-	Medium confidence
Development & Growth	Hinton et al. 1987	Sprague-Dawley Rat (Developmental)	Female	Oral diet (4mon)	Body weight gain week 0-4, 4-8, 9-16 and food consumption week 0-8 and 9-16 for immunized vs non-immunized	2-10	depending on endpoint	yes	0.0075	0.01	Low confidence	Significant increase of body weight gain in female and male rats (different weeks, not consistent). In male rats during week 4-8, significant decrease (non-monotonic) of body weight gain. One study found that average crown rump length was decreased although only significantly in one lower concentration. Body weight gain was found to be significantly decreased in one study for male rats but in ano…	High	- Important and unexplained inconsistency		Medium	Development & Growth
			Male		Body weight gain week 0-4, 4-8, 9-16 and food consumption week 0-8 and 9-16 for immunized vs non-immunized	2-10	depending on endpoint	yes	-	-
	Philbrook et al., 2018	C57Bl/6 Mice (Developmental)	Combined	Parental (6d)	Morphological and skeletal defects, average fetal weight and crown rump length	10	increase (morph defects), decrease (crown rump length)	only at 25 mg/kg (crow rump length)	-	-	Medium confidence
	Wang et al. 2018	ICR Mice (Developmental)	Male	Subcutaneous injection (9d)	Growth, body weight	5	increase, then decrease	only at 2 µg/day	-	-	Medium confidence
	Welsh et al., 1987	Sprague-Dawley Rats (Developmental)	Combined	Parental (20d)	Specific external fetal variations	28-38	increase	no	-	-	Medium confidence
			Combined		Sternebral variations, litter with at least 1 or 2 variations	27-38	no change	no	-	-
			Combined		Skeletal variations excluding sternebrae, litter with at least 1 or 2 variations	27-38	no change	no	-	-
			Combined		Moderate hydroureter or enlarged ureter (moderate)	28	increase, then decrease (both)	yes	Control	0.0025
			Female		Body weight and crown rump length	202-260	decrease	no	-	-
			Male		Body weight and crown rump length	175-233	increase (body weight)	only at 0.5 and 1 %	-	-
General Toxicity in Adults	Philbrook et al., 2018	C57Bl/6 Mice (Adult (gestation))	Female	Intraperitoneal injection (6d)	Body weight gain	10	no change	no	-	-	Medium confidence	Inconsistent data on weight gain.	High	- Important and unexplained inconsistency		Medium	General Toxicity on Adults
	Sobotka et al. 1986	Sprague-Dawley Rats (Adult)	Male	Oral diet (4mon)	Cumulative body weight gain, at 1, 2, 4, 5 months	50	decrease	yes	0.0025	0.005	Low confidence
	Welsh et al., 1987	Sprague-Dawley Rats (Adult)	Female	Oral diet (91d)	Weight gain and food consumption (day 0-7, 7-14, 14-20)	29-38	decrease (weight gain), increase (food consumption)	yes	Control	0.25 mg/kg bw/day	Medium confidence

## Sheet: Adverse outcomes in vivo NM
Outcome group	Study	Species/Strain (Exposure lifestage)	Sex	Exposure route/duration	Endpoint	N	Trend	Significant from control? (p<0.05)	NOEL	LOEL	Study confidence	Summary	Initial confidence	Downgrade	Upgrade	Evidence rating for outcome group	Outcome group
Male reproductive system	Liu et al. 2013	Zebrafish (wild type) (Adult)	Male	Whole body (3wk)	Gonadosomatic index	5	increase, then decrease	no	-	-	Medium confidence	No significant effects on gonadosomatic index.	High	- imprecise or sparse data		Medium (Note: concerned that we're overrating the evidence)	Male reproductive system
	Liu et al. 2016	Zebrafish (wild type) (Multi-lifestage)	Male	Whole body (4mon)	Gonadosomatic index	5	decrease	no	-	-	High confidence
Female reproductive system	Liu et al. 2013	Zebrafish (wild type) (Adult)	Female	Whole body (3wk)	Gonadosomatic index	5	increase	no	-	-	Medium confidence	Significant decrease of gonadosomatic index, but not for all concentrations, while in another study, a non-significant increase was observed.	High	- imprecise or sparse data		Medium (Note: concerned that we're overrating the evidence)	Female reproductive system
	Liu et al. 2016	Zebrafish (wild type) (Multi-lifestage)	Female	Whole body (4mon)	Gonadosomatic index	5	decrease	only at 5 and 500 µg/l	-	-	High confidence
Reproductive function	Liu et al. 2013	Zebrafish (wild type) (Adult)	Female	Whole body (3wk)	Egg/female/spawning, spawning events/female and fertilization success	6	decrease	yes (except for fertilization success)	0.04 mg/l	0.2 mg/l	Medium confidence	In Fish, the number of eggs/female/spawning and the spawning events/female significantly decreased and a dose response relationship could be observed. Fertilization success decrease insignificantly.	High	- Imprecise or sparse data		Medium (Note: concerned that we're overrating the evidence)	Reproductive function
Neurodevelopment	Oliveri et al., 2015	Zebrafish (AB-type) (Developmental)	Not reported	Whole body (6d)	Motility, distance traveled (dark, habituation, light)	26	no change	no	-	-	High confidence	In Fish, there was a significantly (dose response) effect on novel tank exploration only although other effects could be observed as well (decrease in predator escape, decrease in social affiliation, decrease in startle habituation. Fish embryo were affected by their swimming speed.	High		not applicable	High	Neurodevelopment
		Zebrafish (AB-type) (Multi-lifestage)		Whole body (14wk)	Novel tank exploration, predator escape, social affiliation, startle habituation	28	increase (tank exploration), mostly decrease (rest)	yes (only tank exploration)	0.03 µM	0.3 µM
	Sun et al. 2016	Japanese Medaka (d-rR) embryos	Combined	Whole body (14d)	Locomotor behavior - swimming speed	150	decrease	yes	25 µg/l	125 µg/l	Medium confidence
Neurotoxicity	Palawski et al. 1983	Rainbow Trout (Adult)	Not reported	Whole body (4d)	Immobility among survivors and recovery of immobile fish	100	increase	no	-	-	Low confidence	Rainbow trout were found to be immobilized but that was recoverable and the study quality very low.	High	- Limitations in methodological quality		Medium (Note: concerned that we're overrating the evidence)	Neurotoxicity
	Johannsen et al. 1977	White leghorn chicken (Adult)	Female	Diet (6d)	Histology and neurotoxicological behaviour	9	no change	no	-	-	Low confidence
Metabolism	Liu et al. 2013	Zebrafish (wild type) (Adult)	Female	Whole body (3wk)	Hepatosomatic index	5	increase	no	-	-	Medium confidence	No significant changes on hepatosomatic index in fish.	High	- Important and unexplained inconsistency - Imprecise or sparse data		Low	Metabolism
			Male		Hepatosomatic index		no clear pattern	no	-	-
	Liu et al. 2016	Zebrafish (wild type) (Multi-lifestage)	Female	Whole body (4mon)	Hepatosomatic index	5	no change	no	-	-	High confidence
			Male		Hepatosomatic index		decrease	no	-	-
Cardiovascular system	Du et al. 2015	Zebrafish (AB strain) embryo	Combined	Whole body (96h)	Pericardium edema incidences	20	increase	not reported	-	EC50: 640 µg/l	Medium confidence	Pericardial (edema) area increased consistently, heart rate decreased in 2 studies significantly, cardiac looping increased significantly in one study.	High			High	Cardiovascular system
				Whole body (70h)	Heart rate	10	decrease	yes	0.1	0.5
					Cardiac looping block		increase	yes	Control	0.1
				Whole body (72h)	Heart rate	4	no clear pattern	at 0-12, 12-24 and 60-72 hpf	-	-
					Cardiac looping length		increase, then decrease	at 12-24, 24-36, 36-48 and 48-60 hpf	-	-
	Isales et al. 2015	Zebrafish (transgenic) embryos	Combined	Whole body (67h)	Heart rate	32	no clear pattern	no	-	-	Medium confidence
					Pericardial area		increase	yes	3.125	6.25
	McGee et al. 2013	Zebrafish (5D strain) embryos	Combined	Whole body (90h)	Pericardial edema area	3	increase	yes	0	2	Low confidence
					Heart rate		decrease	yes	0	4
	Mitchell et al. 2018	Zebrafish (5D strain) embryos	Combined	Whole body (48h)	Pericardial area	10-30	increase	yes	6.7	8.4	High confidence
	Sun et al. 2016	Japanese Medaka (d-rR) embryos	Combined	Whole body (14d)	Heart rate	3	decrease	except for at 25 µg/l	25	125	Medium confidence
					Gross cardiac abnormality rate		increase	yes	125	625
Growth (Adults)	Liu et al. 2013	Zebrafish (wild type) (Adult)	Female	Whole body (3wk)	Growth: condition factor	5-6	increase	no	-	-	Medium confidence	Hatchability for zebrafish significantly decreased. No changes in growth for rainbow trout adults. Significantly decreased growth in males only. No change in females.	High	- Important and unexplained inconsistency - Imprecise or sparse data		Low	Growth (Adults)
	Palawski et al. 1983	Rainbow Trout (Adult)	Not reported	Whole body (4d)	Growth, day 0 and day 30 post exposure	100	no change	no	-	-	Low confidence
	Liu et al. 2016	Zebrafish (wild type) (Multi-lifestage)	Female	Whole body (4mon)	Growth: condition factor	5	no change	no	-	-	High confidence
			Male			5	decrease	yes	50 µg/l	500 µg/l	High confidence
Development & Growth	Liu et al. 2013	Zebrafish (wild type) (Developmental)	Combined	Whole body (3wk)	Hatchability		Decrease	yes	0.04 mg/l	0.2 mg/l	Medium confidence	Significant decrease in body length in 3 studies. Hatchability, time to hatching and malformation rates negatively affected (significantly).	High			High	Development & Growth
	Liu et al. 2016	Zebrafish (wild type) (Developmental)	Combined	Whole body (14d)	Growth: condition factor	10	no change	no	-	-	High confidence
	Liu et al. 2016	Zebrafish (wild type) (Developmental)	Combined	Whole body (30d)	Growth: condition factor	5	no change	no	-	-	High confidence
	Behl et al. 2015	Zebrafish (Wild type) embryos	Combined	Whole body (5d)	Embryo development	1 per well (96 well plates)	increase, then no change	not reported	-	PoD: 2 µM	High confidence
	Isales et al. 2015	Zebrafish (transgenic) embryos	Combined	Whole body (67h)	Body length	32	decrease	yes	25	50	Medium confidence
	Kim et al. 2015	Zebrafish (Wild type) embryos	Combined	Whole body (7d)	Hatchability	6	increase, then decrease	no	-	-	Medium confidence
					Larval survival		decrease	no	-	-
					Malformation rate		increase	yes	200	500
					Body weight		no change	no	-	-
	Liu et al. 2013a	Zebrafish (AB strain) embryos	Combined	Whole body (68h)	Hatching rate at 72 hpf	4	decrease, then increase	yes	20	100	Medium confidence
	McGee et al. 2013	Zebrafish (5D strain) embryos	Combined	Whole body (90h)	Body length	3	decrease	yes	0	2	Low confidence
	Mitchell et al. 2018	Zebrafish (5D strain) embryos	Combined	Whole body (48h)	Hatching rate	10-31	decrease	not reported	-	-	High confidence
					Body length		decrease	yes	13.1	16.4
	Sun et al. 2016	Japanese Medaka (d-rR) embryos	Combined	Whole body (14d)	Hatchability	3	decrease	yes	125	625	Medium confidence
					Time to hatching		increase	yes	25	625
					Body length		decrease, then no change	yes	25	125
invertebrates
Reproduction	Behl et al. 2016	Caenorhabditis Elegans (Adult)	Not reported	Whole body (2d)	Reproduction (number of offspring)	18-36	decrease	not reported	-	-	High confidence	Decrease number of offspring in nematode reproduction assay by a large extent (significance not tested). Decreased accumulated offspring in Daphnia	High	- Imprecise or sparse data		Medium	Reproduction
	Yuan et al. 2018	Daphnia magna neonates	Combined	Whole body (21d)	Accumulated offspring	4	decrease	yes	50	500	High confidence
Growth (adult)	Behl et al. 2016	Caenorhabditis Elegans (Adult)	Not reported	Whole body (1d)	Feeding rate	18-36	increase	not reported	-	-	High confidence	Large effects on feeding of nematodes.	High	- Imprecise or sparse data		Medium (Note: concerned that we're overrating the evidence)	Growth (adult)
Development & Growth	Behl et al. 2015	Caenorhabditis elegans (Bristol N2 (Wild type)) larvae	Combined	Whole body (2d)	Larval development	150	decrease	not reported	-	PoD: 0.9 µM	High confidence	Decrease in larval development in nematodes (significance not reported) as well as body length in daphnia offspring (significant). Large effects on growth of nematodes.	High			High (Note: concerned that we're overrating the evidence)	Development & Growth
	Yuan et al. 2018	Daphnia magna neonates	Combined	Whole body (21d)	F0 body length	40	decrease	yes	50	500	High confidence
					F1 body length		decrease	yes	50	500
	Behl et al. 2016	Caenorhabditis Elegans (Developmental)	Not reported	Whole body (2d)	Growth	18-36	increase	not reported	-	-	High confidence

## Sheet: Endocrine activity in vivo mamm
Outcome group	Study	Species/Strain (Exposure lifestage)	Species sex	Exposure route/duration	Endpoint	Trend	Significant from control? (p<0.05)	NOEL	LOEL	Study confidence	Results	Summary	Initial confidence	Downgrade	Upgrade	Evidence rating for outcome group	Outcome group
Androgen activity (mice)	Chen et al., 2015	ICR Mice (Developmental)	Male	Diet (5wk)	Testicular testosterone concentration	decrease	yes	-	100 mg/kg bw/day	Low confidence	Decreased testicular testosterone concentration and decreased gene expression of 6 out of 8 tested genes involved in testicular testosterone transport in mice.	Decreased testosterone concentration and expression of genes involved	High	- Limitations in methodological quality - Imprecise or sparse data		Low	Androgen activity (mice)
					Testicular testosterone transport: Gene expression (various genes covered)	generally decrease	yes	100 mg/kg bw/day	300 mg/kg bw/day
Androgen activity (humans)	Meeker et al. 2010	Human adults	Male	-	FSH, LH, inhibin B, testosterone, estradiol, SHBG, FAI, prolactin	mostly increase (except inhibin B and FAI)	yes	-	-	Low confidence	Only Prolactin significantly increased. Non significant increase in FSH, LH,testosterone, estradiol and SHBG. Non-significant decrease in inhibin B and FAI.	Increased prolactin	Medium	- Limitations in methodological quality - Imprecise or sparse data		Low	Androgen activity (humans)
Thyroid system (rats)	Green et al. 2017	Rat (Adult)	Female	Parental (35d)	Hormone levels of total T4, TSH	decrease	no	-	-	High confidence	Slight decrease of total T4 and TSH but not significant		High	- Imprecise or sparse data		Medium	Thyroid system (rats)
			Male	Diet (35d)		decrease	no	-	-
Thyroid system (humans)	Meeker et al. 2010	Human adults	Male	-	Free T4, total T3	decrease (fT4), increase (TT3, TSH)	no	-	-	Low confidence	Weak associations between TPHP exposure and fT4 or TSH levels shown in 2 studies although not significant.	Association between TT4 levels and TPHP exposure in humans	Medium	Important and unexplained inconsistency		Low	Thyroid system (humans)
	Preston et al. 2017	Human adults	Combined	-	Total T4, free T4, total T3, TSH	positive association	yes	-	-	Medium confidence	Significant association between TT4 and TPHP exposure, moreso in women than in men. TT3 was increased but to a smaller degree.
Lipid metabolism (developmental)	Green et al. 2017	Rat (Adult)	Female	Parental (35d)	Adipogenesis: Cebpa, Cebpb, Pparg expression	decrease	no	-	-	High confidence	Decrease in adipogenesis and as well as adiponectin and leptin in females (not significant). In males, significant decrease in total non-esterified fatty acids and leptin.	Decrease of total non-esterified fatty acids in male mice Decreased leptin in male mice Significant alteration of lipid metabolism in female and male mice	High			abstain (Cannot draw conclusion because complexity of data not anticipated by data extraction strategy)	Lipid metabolism (developmental)
					Blood test: Adiponectin, leptin	decrease	no	-	-
			Male		Adipogenesis: Cebpa, Cebpb, Pparg expression	increase	no	-	-
					Blood test: cholesterol, leptin, total non-esterified fatty acids, triglycerides, adiponectin,	depending on endpoint	yes (leptin, FAs)	-	170 µg/d
	Wang et al., 2018	ICR Mice (Developmental)	Female	Subcutaneous injection (9d)	Analysis of lipid metabolism (choline, lipid, phosphocholine, PUFA, taurine, UFA)	mostly decrease	yes	2 µg/day	200 µg/day	Medium confidence	Significant effects on lipid metabolism (decrease of choline, lipid, PUFA, UFA) for females. In male mice significant increase in lipid-metabolism (except for choline, which decreased).
			Male			mostly increase	yes	-	2 µg/day
Glucose homeostasis (Adult)	Green et al. 2017	Rat (Adult)	Female	Parental (35d)	Blood test: Glucose/insulin tolerance	increase	no	-	-	High confidence	Non-significant increase in fasting glucose levels/insulin tolerance in females In males, significant decrease in blood glucose and increase in insulin resistance	Decreased blood glucose and increased insulin resistance in male rats Transcription of Irs2 decreased in female mice	High	- imprecise or sparse data		Medium	Glucose homeostasis (Adult)
			Male		Blood test: glucose, glycated albumin, insulin/insulin resistance, pancreatic beta cell function, glucose/insulin tolerance	depending on endpoint	yes	-	170 µg/d
	Philbrook et al., 2018	C57Bl/6 Mice (Adult (gestation))	Female	Intraperitoneal injection (6d)	Transcription of Irs1/2, and Insr	decrease	yes	-	5 mg/kg	Medium confidence	Significant decrease of lrs2 in female adults.
Growth hormone/IGF-1 (adult)	Philbrook et al., 2018	C57Bl/6 Mice (Adult (gestation))	Female	Intraperitoneal injection (6d)	Igf1 protein levels and transcription of Igf1, Igf2, Igfbp1, Igf1r	decrease	yes	-	5 mg/kg	Medium confidence	Significant decrease of lgf1 protein levels and Igf1 transcription in female adults.	Significant decrease of lgf1 protein levels and Igf1 transcription in female adults.	High	- imprecise or sparse data		Medium	Growth hormone/IGF-1 (adult)
Growth hormone/IGF-1 (developmental)	Philbrook et al., 2018	C57Bl/6 Mice (Developmental)	Female	Parental (6d)	Igf1 protein levels and transcription of Igf1, Igf2, Igfbp1, Igf1r	increase	except at 50 mg/kg	-	-	Medium confidence	Significant increase of Igf1, Igf2, Igf1r, Igf2r in fetal livers	Significant increase of Igf1, Igf2, Igf1r, Igf2r in fetal livers	High	- imprecise or sparse data		Medium	Growth hormone/IGF-1 (developmental)
			Male			increase	except at 50 mg/kg	-	-
Immune system (developmental)	Hinton et al., 1987	Sprague-Dawley Rat (Developmental)	Female	Diet (4mon)	Humoral response to SRBC, primary/secondary/tertiary responses	no clear pattern	no	-	-	Low confidence	In female rats, only an increase of alpha-globulin observed. Otherwise no evidence of other effects (serum total prot conc increase only slightly). In male rats, no clear patterns except for a decrease of alpha globulin and a significant increase of beta-globulin.	Increased alpha-globulin levels in female rats Increased beta-globulin in male rats	High	- Limitations in methodological quality - imprecise or sparse data		Low	Immune system (developmental)
					Relative Percentages of albumin,alpha/beta/gamma-globulin midterm	increase	yes	-	0.0025
					Serum total protein concentration, midterm and terminal (nonimmunized controls)	increase	no	-	-
			Male		Humoral response to SRBC, primary/secondary/tertiary responses	no clear pattern	no	-	-
					Relative Percentages of albumin,alpha/beta/gamma-globulin midterm	mostly increase, decrease for alpha-globulin	yes	-	0.0025
					Serum total protein concentration, midterm and terminal (nonimmunized controls)	no clear pattern	no	-	-
Cardiovascular system	Zhao et al. 2016	Human adults	Combined	-	Sphingolipid homeostasis: SM, Cer, SPH and S1P content	increase (Sm, Cer), decrease (Sph, S1P)	yes	-	-	Medium confidence	Increase of SM and decrease of S1P (significant), increase of Cer and decrease of Sph (not-significant).	Increased sphingomyelin in humans Decreased S1P in humans	Medium	- imprecise or sparse data		Low	Cardiovascular system
Other effects	Chen et al., 2015	ICR Mice (Developmental)	Male	Diet (5wk)	Oxidative stress, MDA, GSH, SOD, CAT, GPX, GST activity												Other effects
					Oxidative stress, Sod1/Sod2/Gpx1/Gpx2/Cat/Gsta1 mRNA expression
	Wang et al., 2018	ICR Mice (Developmental)	Female	Subcutaneous injection (9d)	Analysis of branch-chain aminoacid metabolism (isoleucine, leucine, valine), pyruvate metabolism (acetate, lactate, pyruvate), TCA metabolism (citrate, fumarate, succinate)
			Male
	Soubry et al. 2017	Human adults	Male	-	DNA methylation in sperm: Various genes and sites.	positive association	yes	-	-	Medium confidence	Positive association, often with statistical significance, between increasing TPHP exposue and DNA methylation.
Glucose homeostasis (Developmental)	Philbrook et al., 2018	C57Bl/6 Mice (Developmental)	Female	Parental (6d)	Transcription of Irs1/2, and Insr	increase	yes	-	-	Medium confidence	Significant increase of Irs1/2 transcription in fetal liver only on the lowest (5 mg/kg) dose. Significant increase of Insr transcription except for the highest dose (50 mg/kg).	Transcription of Irs1,2, and Insr transcription in fetal liver increased					Glucose homeostasis (Developmental)
			Male		Transcription of Irs1/2, and Insr	increase	yes	-	-

## Sheet: endocrine activity in vivo NM
Outcome group	Study	Species/Strain (Exposure lifestage)	Species sex	Exposure route/duration	Endpoint	Trend	Significant from control? (p<0.05)	NOEL	LOEL	Study confidence	Results	Summary	Initial confidence	Downgrade	Upgrade	Evidence rating for outcome group	Outcome group
Estrogen activity	Liu et al. 2012	Zebrafish (Adult)	Male & Female	Whole body (2wk)	17beta-estradiol level	increase	yes	0.2 mg/l	1 mg/l	High confidence	Significant increase E2 levels.	Increase estradiol levels in female and male fish, with increased gene transcription for some relevant genes (e.g. ER2beta1 and Eralpha)	High			High (gene transcription not considered in the rating)	Estrogen activity
	Liu et al. 2013	Zebrafish (wild type) (Adult)	Male & Female	Whole body (3wk)	Gene transcription, 17betaHSD, 3betaHSD, AR, CYP11A, CYP17A, CYP19A, CYP19B, ER2b1, ERa, FSHb, FSHR, GnRH2, GnRH3, GnRHR1-4, HMGRA, HMGRB, LHb, LHR, StAR	estrogen related genes mostly increased	yes	-	0.04 mg/l	Medium confidence	Significantly increase in gene transcription of ER2beta1 and Eralpha. In males: Significant increase of E2 only in 2nd highest dose. Vitellogenin significantly increased in highst dose. In females: Significant increase of E2 and VTG starting from highest and 2nd highest dose respectively
					plasma hormone levels: 17beta-estradiol, vitellogenin	increase	yes	0.2 mg/l	1 mg/l
	Liu et al. 2016	Zebrafish (wild type) (Multi-lifestage)	Male& Female	Whole body (4mon)	Gene transcription of 17betaHSD, 3betaHSD, AR, CYP11A, CYP17A, CYP19A, CYP19B, ER2b1, ERa, FSHb, FSHR, GnRH2, GnRH3, GnRHR1-4, HMGRA, HMGRB, LHb, LHR, StAR	Increase (Eralpha)	yes	50 µg/l	500 µg/l	High confidence	No changes in ERbeta or ERalpha genes except for significant increase of ERalpha transcription in females. Significant E2 level increase in females and males for the highest and lowest dose respectively.
					plasma hormone levels: 17b-estradiol	increase	yes	-	5 µg/l
Androgen activity	Liu et al. 2012	Zebrafish (Adult)	Male & Female	Whole body (2wk)	Plasma hormone levels: 11-ketotestosterone, testosterone	decrease in males only	yes	0.2 mg/l	1 mg/l	High confidence	Significant decrease of T and 11-KT in male zebrafish	Decrease of Testosterone and 11-ketotestosterone in male and female zebrafish	High	-Important and unexplained inconsistency		Medium	Androgen activity
	Liu et al. 2013	Zebrafish (wild type) (Adult)	Male & Female	Whole body (3wk)	plasma hormone levels: 11-ketotestosterone, testosterone	decrease in females only	yes	0.2 mg/l	1 mg/l	Medium confidence	Significant decrease of T and 11-KT in female zebrafish
	Liu et al. 2016	Zebrafish (wild type) (Multi-lifestage)	Male & Female	Whole body (4mon)	11-ketotestosterone level	decrease	yes	-	5 µg/l	High confidence	Significant decrease of 11-KT at 5 µg/l for male and 50 µg/l for female zebrafish
Steroidogenesis	Liu et al. 2012	Zebrafish (Adult)	Male & Female	Whole body (2wk)	Gene transcription of CYP17, CYP19A, VTG	generally increase	yes	-	0.04 mg/l	High confidence	Significant increase CYP17, CYP19A and VTG (except females) expression, plasma hormone levels of 17b-estradiol increased in male but decreased in female fish. 11-ketotestosterone and testosterone decreased.	Decreased testosterone production and expression of genes involved Decreased 11-ketotestosterone levels Shift towards higher E2/11-KT ratio Significant changes in plasma cortisol levels (males decrease, females increase)	High			High	Steroidogenesis
					Plasma hormone levels: 11-ketotestosterone, 17beta-estradiol, testosterone	depending on endpoint	yes	0.2 mg/l	1 mg/l
	Liu et al. 2013	Zebrafish (wild type) (Adult)	Male & Female	Whole body (3wk)	Gene transcription, 17betaHSD, 3betaHSD, AR, CYP11A, CYP17A, CYP19A, CYP19B, ER2b1, ERa, FSHb, FSHR, GnRH2, GnRH3, GnRHR1-4, HMGRA, HMGRB, LHb, LHR, StAR	mostly increase	yes	-	0.04 mg/l	Medium confidence	Many gene transcriptions significantly affected, mostly upregulated. Increase of plasma hormone levels except for testosterone, which decreased for males. Decrease for 11KT and testosterone, increase for E2 and vitellogenin for females.
					plasma hormone levels: 11-ketotestosterone, 17beta-estradiol, testosterone, vitellogenin	depending on endpoint	yes	0.04 mg/l	0.2 mg/l
	Liu et al. 2016	Zebrafish (wild type) (Multi-lifestage)	Male & Female	Whole body (4mon)	Gene transcription of 17betaHSD, 3betaHSD, AR, CYP11A, CYP17A, CYP19A, CYP19B, ER2b1, ERa, FSHb, FSHR, GnRH2, GnRH3, GnRHR1-4, HMGRA, HMGRB, LHb, LHR, StAR	depending on endpoint	yes	5 µg/l	50 µg/l	High confidence	Significant increase of 3betaHSD, FSHR, LHb, LHR whereas CYP17, GnRH3 and StAR decreased in males. In females, sporadic changes in several genes were observed, but only CYP19A, ERa,GnRH3, LHb, LHR and StAR significantly increased.
					plasma hormone levels, 11-ketotestosterone, 17b-estradiol	decrease, E2 increase	yes	-	5 µg/l		Significant decrease of 11-ketotestosterone levels in both males and females. Irregular increase of E2 in females.
		Zebrafish (wild type) (developmental & adult)	Male & Female	Whole body (4mon)	Gene transcription (hpa axis): CRH, CRHBP, CRHR2, GR, MR, POMC	increase	yes	50 µg/l	500 µg/l		MR and POMC significantly increased in females; only POMC in males (CRH not significantly increased
					Plasma hormone levels of cortisol	decrease (males), increase (females)	yes	5 µg/l	50 µg/l		Cortisol levels significantly decreased in males and increased in females
Thyroid system	Liu et al. 2016	Zebrafish (wild type) (developmental & adult)	Female	Whole body (4mon)	Gene transcription, hpt axis, TRH, TRHR2, TSHb	increase	yes	50 µg/l	500 µg/l	High confidence	Females: Increase of TRHR2 transcription only. Significant increase of both T4 and T3. Males: Increase of TRH transcription only. Increase of T4, decrease of T3 but insignificant	Increased T3 and T4 in female fish Increased expression of genes involved in thyroid hormone system	High	- imprecise or sparse data		Medium	Thyroid system
					Plasma hormone levels of T4, T3	increase	yes	50 µg/l	500 µg/l
			Male		Gene transcription: TRH, TRHR2, TSHb	decrease	yes	50 µg/l	500 µg/l
					plasma hormone levels, T4, T3	increase	no	-	-
Lipid metabolism (adults)	Du et al. 2016	Zebrafish (Ab Strain) (Adult)	Combined	Whole body (1wk)	Analysis of metabolites involved in lipid and fatty acid metabolism	depending on metabolite	yes	-	0.05 mg/l	Medium confidence	Significant effect on lipid/fatty acid metabolism. Significant increase in HDL-cholesterole, total cholesterole and triglyceride in blood	Increased cholesterole and triglyceride in fish Significant alterations of metabolite concentrations involved in lipid/fatty acid metabolism.	High	- imprecise or sparse data		Medium	Lipid metabolism (adults)
					HDL-C, LDL-C, total C, triglyceride content in blood	increase	yes	-	0.05 mg/l
Glucose homeostasis	Du et al. 2016	Zebrafish (Ab Strain) (Adult)	Combined	Whole body (1wk)	Glucose content in blood	increase	yes	-	0.05 mg/l	Medium confidence	Significant increase in glucose in blood	Increased glucose level in zebrafish	High	- imprecise or sparse data		Medium	Glucose homeostasis
Neurotoxicity	Yuan et al., 2016	Rare minnows (Adult)	Combined	Whole body (4d)	Acetylcholinesterase/Butyrylcholinesterase inhibition												Neurotoxicity
Other effects	Du et al. 2016	Zebrafish (Ab Strain) (Adult)	Combined	Whole body (1wk)	Analysis of metabolites involved in amino acid, and trimethylamine n-oxide metabolism												Other effects
					Pyruvate content in blood
invertebrates
Thyroid system	Yuan et al. 2018	Daphnia magna neonates	Combined	Whole body (21d)	Gene expression - Thyroid hormone synthesis	increase	yes	-	5 µg/l	High confidence	Gene expression of itpr1. lrp2 and hsp90b significantly increased						Thyroid system
Lipid metabolism	Yuan et al. 2018	Daphnia magna neonates	Combined	Whole body (21d)	Gene expression - Fatty acid metabolism and PPAR signalling	increase	yes	-	5 µg/l	High confidence	Gene expression increased in daphnia for PPARG signalling and fatty acid metabolism						Lipid metabolism
Glucose homeostasis	Yuan et al. 2018	Daphnia magna neonates	Combined	Whole body (21d)	Gene expression - Pancreatic secretion	increase	yes	-	5 µg/l	High confidence	Gene expression increased in daphnia for pancreatic secretion						Glucose homeostasis
Other effects	Yuan et al. 2018	Daphnia magna neonates	Combined	Whole body (21d)	Gene expression - Spliceosome pathway (fold change)												Other effects
					Gene expression - Ribosome pathway (fold change)
					Gene expression - Aminoacyl-tRNA biosynthesis pathway (fold change)
					Gene expression - RNA transport (fold change)
					Gene expression - Protein processing in endoplasmic reticulum (fold change)
					Gene expression - Proteasome (fold change)
					Gene expression - Lysosome (fold change)
					Gene expression - Regulation of actin skeleton (fold change)
					Gene expression - Uurine metabolism and biosynthesis of secondary metabolites
					Gene expression - PI3K-Akt signaling pathway

## Sheet: Endocrine activity in vitro mam
Outcome group	Study	Test system	Type/tissue	Exposure duration	Endpoint	Trend	Significant from control? (p<0.05)	NOEL	LOEL	Study confidence	Results	Summary	Initial confidence	Downgrade	Upgrade	Evidence rating for outcome group	Outcome group
Estrogen activity	Liu et al. 2012	Human MVLN cells	breast	72 hours	Competitive E2 receptor binding affinity	decrease	yes	-	0.001 mg/l	High confidence	E2 binding affinity significantly reduced in human MVLN cells.	Estradiol binding competitively decreased Estrogenic potential confirmed in MCF-7 cells	High			High	Estrogen activity
	Kojima et al. 2013	Chinese hamster ovary (CHO) K1 cells	ovary	24 hours	Activation of ERalpha	increase	not reported	-	-	Medium confidence	Increased activation of ERalpha+ERbeta but significance not tested.
					Activation of ERbeta	increase	not reported	-	-
	Kojima et al. 2016	Chinese hamster ovary (CHO) K1 cells	ovary	24 hours	Estrogen receptor alpha agonism	increase	not reported	-	-	Medium confidence	Increase of ERalpha+ERbeta activation, significance not reported
					Estrogen receptor beta agonism	increase	not reported	-	-
					Estrogen receptor beta antagonism	no clear pattern	no	-	-		No ERbeta antagonism
		Human MCF-7 cells	breast	24 hours	Estrogenic potential (MCF-7 proliferation)	increase	yes	62.5 µM	125 µM	High confidence	Significant estrogenic potential. No anti-estrogenic effect.
					Anti-estrogenic potential (MCF-7 anti-proliferation)	no change	no	-	-
	Owens et al. 2007	Human T47D-Kbluc cells	-	24 hours	Estrogenic activity (reporter gene assay)	no change	no	-	-	Low confidence	No estrogenic activity
Anti-androgen activity	Chen et al. 2015b	Mouse leydig cell TM3	testis	24 hours	Testosterone concentration, with and without hCG	decrease	yes	20 mg/ml	60 mg/ml	Low confidence	Significant decrease of Testeosterone levels.	Decrease of Testosterone Human androgen receptor antagonism in 2 studies.	High			High	Anti-androgen activity
	Kojima et al. 2013	Chinese hamster ovary (CHO) K1 cells	ovary	24 hours	Human androgen receptor antagonism	increase	yes	10 µM	30 µM	Medium confidence	Significant antagonistic effect on human androgen receptor.
	Kojima et al. 2016	Chinese hamster ovary (CHO) K1 cells	ovary	24 hours	Androgen receptor antagonism	increase	yes	3 µM	10 µM	Medium confidence	Significiant androgen receptor antagonism.
Steroidogenesis	Chen et al. 2015b	Mouse leydig cell TM3	testis	24 hours	Gene expression: PBR, StAR, P450-scc, 3beta-HSD, P450-17alpha, 17beta-HSD	depends on endpoint	yes	20 µg/ml	60 µg/ml	Low confidence	Significant increase for: StAR, significant decrease for: P450scc, 3beta-HSD, P450-17alpha, 17beta-HSD	Significant change in gene expression for various genes involved in steroidogenesis, mostly decreasing trend Increase of E2/T ratio as 17beta-estradiol increased stronger than testosterone Significant increase of aldosterone production (only one dose tested) No effects on progesterone production of changes in gene expression observed Significant increase of cortisol production	High			High	Steroidogenesis
					Gene expression with hCG stimulus: P450scc, 3beta-HSD, P450-17alpha, 17beta-HSD	decrease	yes	20 µg/ml	60 µg/ml		Significant decrease for all endpoints
	Hu et al. 2017	Human epithelial JEG-3 cells	placenta	48 hours	mRNA change (fold change) of Muc-1 , hCG, PAPP-A, relative hCG, progesterone, 3beta-HSD1	increase	yes	-	5 µM	High confidence	Significant increase of Muc-1, hCG, PAPP-A, relative hCG change, relative progesterone change and 3beta-HSD1 mRNA expression.
	Liu et al. 2012	Human h295R cells	adrenal gland/cortex	48 hours	17beta-estradiol (E2) concentration	increase	yes	0.1 mg/l	1 mg/l	High confidence	Significant increase of 17beta-estradiol and testosterone concentration, but significant increase of E2/T ratio at the same time. Significant increase of CYP11A1, CYP11B2, CYP19A1, SULT1E1 and SULT2A1 expression.
					Testosterone concentration	increase	yes	0.1 mg/l	1 mg/l
					E2/T ratio	increase	yes	0.01 mg/l	0.1 mg/l
					Gene transcription CYP11A1, CYP11B2, CYP19A1, HSD3beta2, SULT1E1, SULT2A1, CYP17A1, CYP21A1, 17betaHSD1, 17betaHSD4, SULT1A1, SULT2B1	increase	yes	0.1 mg/l	1 mg/l
	Schang et al. 2016	Mouse (C57BL/6J) MA-10 leydig tumor cells	testes	48 hours	Progesterone production	no change	no	-	-	Medium confidence	No significant effect on progesterone production. No significant increase of gene expression.
					Stimulated progesterone production with 1 mM dbcAMP	no clear pattern	no	-	-
					Stimulated progesterone production with 100 ng/mL LH	increase, then decrease	no	-	-
					Gene expression of StAR, Tspo, HSD3b, CYP11A1, Lhcgr, Adcy3	increase	no	-	-
	Zhang et al. 2017	Human H295R cells	adrenal gland/cortex	48 hours	Cortisol production	increase	yes	-	5 µM	Medium confidence	Significant increase of cortisol production
				24 hours	Gene expression of steroidogenic genes: StAR, HMGR, 3betaHSD2, CYP17, CYP21, CYP11A1, CYP11B1, CYP11B2	mostly decrease	yes	0.1 µM	1 µM		Mostly decrease of gene expression of steroidogenic genes
				48 hours	Aldosterone production	increase	yes	-	5 µM		Significant increase of aldosterone production (only one dose tested)
mineralocorticoid and glugocorticoid activity	Zhang et al. 2017	Chinese hamster ovary (CHO) K1 cells	ovary	not-reported	MR antagonism	increase	yes	0.1 µM	1 µM	Medium confidence	Significant MR antagonism.	Significant MR and GR antagonism	High			High	mineralocorticoid and glugocorticoid activity
					MR agonism	increase, then decrease	no	-	-
					GR agonism	decrease	no	-	-		Significant GR antagonism.
					GR antagonism	increase	yes	0.1 µM	1 µM
	Kojima et al. 2013	Chinese hamster ovary (CHO) K1 cells	ovary	24 hours	Human glucocorticoid receptor antagonism	increase	yes	10 µM	30 µM	Medium confidence	Significant glucucorticoid receptor antagonism
	Kojima et al. 2016	Chinese hamster ovary (CHO) K1 cells	ovary	24 hours	Glucocorticoid receptor antagonism	increase	yes	10 µM	30 µM	Medium confidence	Significant glucucorticoid receptor antagonism
Thyroid system	Hill et al. 2018	Human lyophilized transthyretin	blood	not-reported	Competitive T4-hTTR binding	increase	yes	256 nM	512 nM	High confidence	Significant hTTR binding. Specific binding increased with concentration.	Human transthyretin binding Expression of genes in thyroid hormone pathway altered	High	- imprecise or sparse data		Medium	Thyroid system
					T4-hTTR specific binding	decrease, then increase	yes	256 nM	2048 nM
	Kim et al. 2015	Rat (Wistar-Furth) Epithelial-like GH3 cells	pituitary	48 hours	Gene expression of tshbeta, tralpha, trbeta, dio1, dio2	mostly increase	yes	1 µg/l	10 µg/l	Medium confidence	Gene expression of tshbeta, tralpha, trbeta and dio1 significantly increased in GH3 cells. Gene expression of nis and tpo significantly increased, while expression of tg, tshr and nkx2.1 decreased in rat FRTL-5 cells.
		Rat FRTL-5 cells	thyroid	24 hours	Gene expression of nis, tg, tpo, tshr, pax8, nkx2.1	various	yes	-	1 mg/l
Lipid metabolism	Cano-Sancho et al. 2017	Mouse fibroblast (3T3-L1) cells	embryo	48 hours/8 days	Gene expression of Cebpb, Cebpd, Cebpa, Pparg, Rxra, Lpl, Mgll, Pbpla2 at day 2 and 8	mostly increase	yes	-	1 µM	High confidence	Gene expression significantly increased for Cebpa, Lpl, Mgll and Pbpla2. Genes involved in lipid metabolism significantly increased (expression of Pnpla2 and Fasn as well as increased adipogenic differentiation).	Adipogenic differentiation and expression of related genes inceased Lipid accumulation and related genes increased Possible increase of phospholipid production Changes (increase and decrease) in gene expression involved in lipid metabolism	High			abstain (lack of expertise to judge sparsity of data)	Lipid metabolism
				48 hours	Lipolysis, basal	increase, then decrease	no	-	-
					Lipolysis, isoproterenol-induced	no clear pattern	except at 0.1 µM	-	0.01 µM
					Lipid metabolism, Lpl , Acaca, Pnpla2, Fasn	increase	yes	5 µM	50 µM
					Adipogenic differentiation	increase, then decrease	only at 10 and 20 µM		10 µM
	Tung et al. 2017	Mouse 3T3-L1 preadipocytes	embryo	9 days	Lipid accumulation	increase	yes	1 µM	10 µM	Low confidence	Lipid accumulation, protein expression of aP2, LPL, PLIN, Cenpalpha, aP2, Lpl, Plin mRNA expression and lipid accumulation (PPARgamma antagonist experiment) significantly increased. Significant decrease of aP2 mRNA expression + GW9662.
					Protein expression of aP2, LPL, PLIN	increase	yes	1 µM	10 µM
				2, 4, 6 and 9 days	Cebpalpha, aP2, Lpl, Plin mRNA expression	increase	yes	-	20 µM
				6 days	aP2 mRNA expression + GW9662	decrease	yes	-	10 µM
	Van den Eede et al. 2015	Human HepaRG cells	liver	72 hours	Altered metabolism - production of phospholipids	increase	not reported	-	-	High confidence	Increase of phospholipid production, significance not tested
	Pillai et al. 2014	Mouse (C57BL/6) BMS2 cells	bone marrow	7 days	Lipid accumulation	increase	yes	1 µM	5 µM	Medium confidence	Lipid accumulation significantly increased in two different cell lines. Gene expression of Fabp4 significantly increased,
		Mouse (C57BL/6J) primary bone marrow cells		12 days	Lipid accumulation	increase	yes	5 µM	10 µM
				7 days	Lipid metabolism: Gene expression of Fabp4	increase	yes	1 µM	5 µM
	Chen et al. 2015b	Mouse leydig cell TM3	testis	24 hours	Gene expression: SR-B1, LDL-R	increase (LDL-R), decrease (SR-B1)	yes	20 µg/ml	60 µg/ml	Low confidence	Increase of LDL-R gene expression while SR-B1 decreases
Glucose homeostasis	Cano-Sancho et al. 2017	Mouse fibroblast (3T3-L1) cells	embryo	48 hours	Glucose uptake, 2-NBDG uptake (no insulin, with insulin)	Increase	yes	-	50 µM with insulin, 0.1 µM without insulin	High confidence	2-NBDG uptake significantly increased starting at 0.1 µM without insulin and 50 µM with insulin.	Increased glucose uptake	High	- imprecise or sparse data		Medium	Glucose homeostasis
				15 minutes	Glucose uptake, GLUT4 translocation (no insulin, with insulin)	increase	yes	-	50 µM		Significantly increased GLUT4 translocation only in combination with insulin (only 50 µM tested)
	Walls et al. 1980	Rat (Long-Evans) microsomal glucose-6-phosphatase	liver	10 minutes	Glucose-6-phosphatase inhibition	no change	not reported	-	-	Low confidence	No effect on glucose-6-phosphatase
AhR activity	McGee et al. 2013	Human HepG2 cells	liver	24 hours	Human AHR-dependent transcription activation	no change	no	-	-	Low confidence	No effects on human AhR-dependent transcription activation.	No effects on human AhR-dependent transcription activation.	High	- Limitations in methodological quality - Imprecise or sparse data		Low	AhR
PPAR activity	Kojima et al. 2016	Cercopithecus aethiops COS-7 cells	kidney	24 hours	Peroxisome proliferator-activated receptor alpha agonism	no change	not reported	-	-	Medium confidence	PPARgamma receptor agonism observed, significance not reported. No change for PPRalpha.	PPARgamma receptor agonism (multiple studies) and antagonism (1 study) mRNA and gene expression for PPARgamma increased	High			High	PPAR
					Peroxisome proliferator-activated receptor gamma agonism	increase, then no change	not reported	-	-
	Hu et al. 2017	Human 293T epithelial cells	kidney	24 hours	Human PPARG activation (normalized activity)	increase	not reported	-	-	High confidence	Increased human PPARG activation, significance no tested
	Fang et al. 2015a	Human recombinant PPARγ LBD receptors	-	3 hours	PPARγ competitive binding	increase	not relevant	-	-	High confidence	PPARgamma binding
	Fang et al. 2015b	Human epithelial cells	embryonic kidney	16 hours	PPARγ1 activation	increase, then decrease	yes	0.4 µM	1.2 µM	High confidence	Significant PPARgamma1 activation
	Kojima et al. 2013	Cercopithecus aethiops COS-7 cells	kidney	24 hours	Peroxisome proliferator-activated receptor alpha agonism	no change	no	-	-	Medium confidence	No PPARalpha agonism
	Pillai et al. 2014	Mouse (C57BL/6J) primary kidney cells	bone marrow	2 hours	PPARgamma ligand binding affinity	decrease	yes	1 µM	10 µM	Medium confidence	PPARgamma: ligand binding affinity significantly decreased but PPARG activity increased.
		Cercopithecus aethiops COS-7 cells	kidney	24 hours	PPARgamma activity with pcDNA vector	increase	yes	-	-
					PPARgamma activity with PPARgamma-DN vector	increase	no
	Tung et al. 2017	Mouse 3T3-L1 preadipocytes	embryo	2, 4, 6 and 9 days	PPARgamma mRNA expression	increase	yes	-	20 µM	Low confidence	PPARgamma mRNA expression increased (only 20 µM tested). Endogenous expression and recruitment of PPARgamma to aP2 enhancer region (IgG and PPARgamma) increased, but only PPARgamma significant. PPRE-dependent aP2 reporter construct activation significantly increased
				6 days	Endogenous expression and recruitment of PPARγ to the aP2 enhancer region - IgG	increase	no	-	-
					Endogenous expression and recruitment of PPARγ to the aP2 enhancer region - PPARgamma	increase	yes	-	20 µM
		Cercopithecus aethiops COS-7 cells	kidney	9 days	PPARgamma antagonism	increase	yes	-	20 µM
				24 hours	PPRE-dependent aP2 reporter construct activation	increase	yes	1	10 µM
	Cano-Sancho et al. 2017	Mouse fibroblast (3T3-L1) cells	embryo	48 hours	Peroxisome proliferator-activated receptor gamma agonism	increase	not reported	-	-	High confidence	PPARgamma agonism observed, but no significance reported
				48 hours/8 days	Gene expression of Pparg	increase	yes	-	1 µM		Gene expression of Pparg significantly increased after 8 days. No change after 2 days.
	Belcher et al. 2014	Chinese Hamster Ovary (CHO) cells	Ovary	24 hours	Nuclear receptor PPARgamma agonist activity	increase, then decrease	only at 30 µM	-	30 µM	Medium confidence	PPARG agonist activity in CHO cells.
RAR/RXR activity	Kojima et al. 2013	Cercopithecus aethiops COS-7 cells	kidney	24 hours	Retinoic acid receptor alpha agonism	no change	no	-	-	Medium confidence	No effects	Decrease of RARalpha, beta and gamma activation in ovarian cells RXRa gene expression increased in one study but not in the other.	High	- important and unexplained inconsistency		Medium	RAR/RXR
					Retinoic x receptor alpha agonism	no change	no	-	-
	Kojima et al. 2016	Cercopithecus aethiops COS-7 cells	kidney	24 hours	Retinoic acid receptor alpha agonism	no change	not reported	-	-	Medium confidence	No effects on retinoic acid or retinoic x receptor alpha agonism.
					Retinoic x receptor alpha agonism	no change	not reported	-	-
	Mitchell et al. 2018	Chinese Hamster ovary (CHO) cells	-	24 hours	Human RXRalpha, beta, gamma gene expression	no change	no	-	-	High confidence	No effects on gene expression of human RXRalpha, beta or gamma.
	Isales et al. 2015	Hamster epithelial cells	ovary	24 hours	Human RARalpha, RARbeta, RARgamma activation	decrease	yes	25 µM	50 µM	Medium confidence	Significant decrease of RARalpha, RARbeta and RARgamma activation
	Cano-Sancho et al. 2017	Mouse fibroblast (3T3-L1) cells	embryo	48 hours/8 days	Gene expression of Rxra	increase	yes	10 µM	25 µM	High confidence	Gene expression of Rxra significantly increased only at 25µM on day 2.
Unspecific tissue effects	An et al. 2016	Human Caco-2 cells	Colon	24 hours	Genotoxicity	increase	yes	50 µM	100 µM	Medium confidence	Genotoxic and cytotoxic in human colon and lung cells. Oxidative stress induced in lung cells.						Unspecific tissue effects
					Cytotoxicity	decrease, then increase	yes	50 µM	100 µM
				4 hours	Oxidative stress	increase, then no change	no	200 µM	-
		Human A549 cells	Lung	24 hours	Genotoxicity	increase, then decrease	yes	50 µM	100 µM
					Cytotoxicity	increase	yes	100 µM	200 µM
				4 hours	Oxidative stress	increase	yes	-	50 µM
	Behl et al. 2015	Mouse embryonic stem cells	-	72 hours	cell differentiation	no change	no	-	-	High confidence	No effects on mouse embryonic stem cell differentiation.
	An et al. 2016	Human HepG2 cells	liver	24 hours	Genotoxicity	increase	yes	50 µM	100 µM	Medium confidence	Genotoxicity, increased oxidative stress and cytotoxicity in liver cells.
				4 hours	Oxidative stress	increase	yes	100 µM	200 µM
				24 hours	Cytotoxicity	increase	yes	100 µM	200 µM
	Cano-Sancho et al. 2017	Mouse fibroblast (3T3-L1) cells	embryo	48 hours	Cell proliferation	increase, then no change	yes	-	0.01 µM	High confidence	Increased cell proliferation.
	Canbaz et al. 2017	Mouse (Balb/c) dendritic cells	bone cells	7 hours	Oxidative stress	no clear pattern	no	-	-	Low confidence
	Schang et al. 2016	Mouse (C57BL/6J) MA-10 leydig tumor cells	testes	48 hours	Superoxide production	increase	yes	1 µM	10 µM	Medium confidence
	Chen et al. 2015b	Mouse leydig cell TM3	testis	24 hours	Gene expression: Sod1, Sod2, Gpx1, Gpx2, Cat, Gsta1, GSH, SOD, CAT, GPX, GST
non-ED related Neurotoxicity	Behl et al. 2015	Embryonic stem cell-derived neuroprogenitor cells (hNP1)	-	24 hours	Cell proliferation	no change	no	-	-	High confidence	Decreased neurite outgrowth and rat neural network activity, not tested for significance						non-ED related Neurotoxicity
		Long-Evans Rat Primary neocortical cultures	-	48 hours	Neurite outgrowth	no change	no	-	-
		Embryonic stem cell-derived neurons (hN2)	-	48 hours	Neurite outgrowth	decrease	not reported	-	PoD: 1.1 µM
		Long-Evans Rat Primary neocortical cultures	-	1 hours	Rat neural network activity	decrease	not reported	-	PoD: 16.3 µM
	Gant et al. 1987	Rat (Sprague-Dawley) brain cell homogenate	-	10 minutes	GABA-induced 36Cl- flux	decrease	not reported	-	-	Low confidence	Decreased GABA-induced 36Cl-flux in rat brain cell homogenate, significance not tested.
			-	90 minutes	[35S] TBPS binding	not-available	not reported	-	IC50 = 12.9 µM
	Hendriks et al. 2014	Rat PC12 pheochromocytoma cells	adrenal gland	24 hours	Reactive oxygen species production	increase	no	-	-	High confidence	Significantly increase reactive oxygen species production in rat neuroblastoma cells. Significantly decreased basal Ca2+ and depolarization-evoked Ca2+ in rat pheochromocytoma cells.
		Rat PC12 pheochromocytoma cells	adrenal gland	20 minutes	Increase basal [Ca2+]	decrease, then increase	yes	10 µM	100 µM
					Depolarization‑evoked [Ca2+]i	decrease	yes	0.1 µM	1 µM
		Rat B35 neuroblastoma cells	central nervous system	24 hours	Reactive oxygen species production	increase	yes	-	1 µM
	Saboori et al. 1991	Human monocyte carboxylesterase	-	10 minutes	Human monocyte carboxylesterase inhibition	increase	not reported,	-	inhibition constant Ki = 8x10^-9 M	Low confidence	Inhibition of human monocyte carboxylesterase
	Vicedo et al. 1985	Human cholinesterase	blood	60 minutes	Human Cholinesterase inhibition	increase	not reported	-	-	Low confidence	Inhibition of human cholinesterase
Immune system (non-ED related)	Canbaz et al. 2017	Mouse (Balb/c) dendritic cells	bone cells	24 hours	Cytokine production IL-6	increase	yes	10 µM	50 µM	Low confidence	Cytokine production IL-6 significantly increased, expression of MHCII, CD80 and CD86 significantly increased.						Immune system (non-ED related)
					Cytokine production IL-10	decrease, then increase	no	-	-
				24 hours	MHCII, CD80, CD86, CD40 expression	increase	yes	10 µM	50 µM
	Esa et al. 1988	Human monocytes	blood	not-reported	Inhibition of monocyte esterase activity	no clear pattern	not reported	-	-	Medium confidence	Significant antigen presentation inhibition.
		Human mononuclear cells	blood	16-18 hours	Tetanus-induced lymphoproliferation, 16-18 hr exposure	increase, then decrease	no	-	-
					Phytohemagglutinin-induced lymphoproliferation, 16-18 hr exposure	decrease	no	-	-
				6 hours	Tetanus-induced lymphoproliferation, 6 hr exposure	increase, then decrease	no	-	-
		Human monocytes	blood	6 hours	Inhibition of antigen presentation	increase	yes	-	1 µM
	Fautz et al. 1994	Mouse (C57BL) thioglycollate-elicited peritoneal macrophages	peritoneum	1 hours	FC-receptor-dependent phagocytosis	increase	not reported	-	-	Low confidence	FC-receptor-dependent phagocytosis and IgM secretion increased, TNF activity, specific NK activity and lymphocyte blastogenesis decreased. No significance testing.
					TNF activity	decrease	not reported	-	-
		Mouse (C57BL) erythrocyte-free spleen cells	spleen	1 hours	Specific NK activity E:T 50:1	decrease	not reported	-	-
					Specific NK activity E:T 100:1	decrease	not reported	-	-
					Lymphocyte blastogenesis LPS	no change	not reported	-	-
					Lymphocyte blastogenesis Con A	decrease	not reported	-	-
					IgM Secretion	increase, then decrease	not reported	-	-
other metabolism	Pillai et al. 2014	Mouse (C57BL/6) BMS2 cells	bone marrow	12 hours	Mineralization	no clear pattern	no	-	-	Medium confidence
	Pillai et al. 2014	Mouse (C57BL/6) BMS2 cells	bone marrow	7 days	Gene expression of Sp7	decrease	yes	1 µM	5 µM	Medium confidence	Expression of Sp7 significantly decreased.
	Pillai et al. 2014	Mouse (C57BL/6J) primary bone marrow cells	bone marrow	12 days	Alkaline phosphatase activity	decrease	yes	1 µM	5 µM	Medium confidence	Alkaline phosphatase activity significantly decreased.
	Kojima et al. 2013	Cercopithecus aethiops COS-7 cells	kidney	24 hours	Pregnane x receptor agonism	increase	not reported	-	-	Medium confidence	Pregnane X receptor agonism observed, significance not reported although effect quite clear
	Kojima et al. 2016	Cercopithecus aethiops COS-7 cells	kidney	24 hours	Pregnane X receptor agonism	increase	not reported	-	-	Medium confidence	Pregnane X receptor agonism observed, significance not reported although effect quite clear

## Sheet: Endocrine activity in vitro NM
Outcome group	Study	Test system	Type/tissue	Exposure duration	Endpoint	Trend	Significant from control? (p<0.05)	NOEL	LOEL	Study confidence	Results	Summary	Initial confidence	Downgrade	Upgrade	Evidence rating for outcome group	Outcome group
Androgen activity	Mitchell et al. 2018	Zebrafish (5D strain) embryos	Combined	Whole body (48h)	Nuclear receptor pathways: Androgen signalling (gene expression)	increase	yes	10 µM	20 µM	High confidence	Significant increase of androgen signaling in fish embryo	Significant increase of androgen signaling in fish embryo	High			abstain (only gene expression data available)	Androgen activity
Estrogen activity	Liu et al. 2013a	Zebrafish (AB strain) embryos	Combined	Whole body (116h)	mRNA expression of genes related to the ER network: ER1, ER2a, ER2b, VTG1, VTG2, VTG4, VTG5, NCOA1, NCOA2, NCOA3, PGR, CCND1	increase (only ER2b)	yes	0.2 mg/l	2 mg/l	Medium confidence	ER2b gene significantly upregulated	Significant increase of mRNA expression of ER2b (gene related to ER network) in fish embryo	High			abstain (only gene expression data available)	Estrogen activity
Thyroid	Su et al. 2014	Chicken embryonic hepatocytes	liver	36 hours	Expression of genes involved in thyroid hormone pathway: TTR, DIO1, NCOA3, IGF1, THRSP	decrease	yes	-	-	High confidence	Expression of genes involved in thyroid hormone pathway significantly decreased (IGF1, THRSP), non-significant for TTR, DIO1 and NCOA3	Increase of expressions of some genes involved in the thyroid hormone pathway (chicken liver cells) Significacntly increased T3 and T4 in fish embryo. Significantly changed (increase or decrease depending on gene) expression of genes relatved to the thyroid system in fish embryo. mRNA expression of some genes related to the thyroid system significantly increased	High	- imprecise or sparse data		Medium	Thyroid
	Kim et al. 2015	Zebrafish (Wild type) embryos	Combined	Whole body (7d)	T4 content	increase, then no change	yes	-	40 µg/l	Medium confidence	Significantly increased T3 and T4 content at 40 µg/l. Gene expression: significant increase of crh, tralpha, nis, tg, dio1, ttr, ugt1ab and significant decrease of trbeta.
					T3 content	increase, then decrease	yes	-	40 µg/l
					Gene expression of crh, tshbeta, trbeta, tralpha, nis, tg, tshr, nkx2.1, pax8, dio1, dio2, ttr and ugt1ab	mostly increase, some decrease	yes	40 µg/l	200 µg/l
	Liu et al. 2013a	Zebrafish (AB strain) embryos	Combined	Whole body (116h)	mRNA expression of genes related to the TRalpha network: NCOR, C1d, HDAC3, Tralpha, PPARgc1a, NCOR2, FUS	increase (Tralpha, PPARgc1a, NCOR2, FUS)	yes	0.2 mg/l	2 mg/l	Medium confidence	mRNA expression of Tralpha, PPARgc1a, NCOR2 and FUS significantly increased
HPA axis	Liu et al. 2013a	Zebrafish (AB strain) embryos	Combined	Whole body (116h)	mRNA expression of genes related to the GR network: GR, HPSE, Re1A, TGBb1, HSP90aa1	increased (GR, Re1A, TGFb1, HSP90aa1), decreased (HPSE)	yes	-	0.02 mg/l	Medium confidence	mRNA expression of genes related to the GR network significantly affected (mostly increased)	Gene and mRNA expression related to HPA axis significantly affected (increase or decrease depending on endpoint)	High			abstain (only gene expression data available)	HPA axis
					mRNA expression of genes related to the MR network: ADRB2a, ADRB2b, UBE2I, MR, HPSE, 11betaHSD, EGFR	decreased (MR, HPSE), increased (11betaHSD, EGFR)	yes	0.02 mg/l	0.2 mg/l		Significant alterations of MR, HPSE (decrease) and EGFR and 11betaHSD (increase) gene expressions
RAAS	Mitchell et al. 2018	Zebrafish (5D strain) embryos	Combined	Whole body (48h)	Nuclear receptor pathways: Aldosterone signalling in epitheliel cells	increase	yes	-	5 µM	High confidence	Aldosterone signalling in epitheliel cells significantly increased	Aldosterone signalling in epitheliel cells significantly increased	High			abstain (only gene expression data available)	RAAS
Lipid metabolism	Su et al. 2014	Chicken embryonic hepatocytes	liver	36 hours	Lipid/cholesterol metabolism	no change	no	-	-	High confidence	No significant effects on lipid/cholesterol metabolism, CYP7B1 or HSD3B1 gene	No significant effects on lipid/cholesterol metabolism, CYP7B1 or HSD3B1 gene	High			abstain (only gene expression data available)	Lipid metabolism
					Farnesoid X receptor and liver x receptor function - CYP7B1	decrease	no	-	-
					Steatosis - HSD3B1 gene	decrease	no	-	-
Cardiovascular system	Du et al. 2015	Zebrafish (AB strain) embryo	Combined	Whole body (72h)	Expression of GATA4, BMP4, NKX2-5 and TBX5	decrease	yes	-	0.5 mg/l	Medium confidence	Vulnerable window between 12 and 48 hours post fertilization, BMP4, NKX2-5 and TBX5 expression significantly decreased.	Expression of genes associated with cardiotoxicity decreased (BMP4, NKX2-5 and TBX5) RXR-dependent pathways affected	High			abstain (only gene expression data available)	Cardiovascular system
	Mitchell et al. 2018	Zebrafish (5D strain) embryos	Combined	Whole body (48h)	FXR/PXR/PPARalpha/VDR/LXR to RXR activation ratio	increase	yes	5 µM	10 µM	High confidence	FXR, PXR, PPARalpha, VDR and LCR to RXR activation ratio increased
AhR activity	Mitchell et al. 2018	Zebrafish (5D strain) embryos	Combined	Whole body (48h)	Nuclear receptor pathways: Aryl hydrocarbon receptor signalling	increase	yes	10 µM	20 µM	High confidence	AhR signalling pathway significantly increased	Significant increase of AhR signalling and expression of genes related to the AhR network	High			abstain (only gene expression data available)	AhR activity
	Liu et al. 2013a	Zebrafish (AB strain) embryos	Combined	Whole body (116h)	mRNA expression of genes related to the AhR network: AhR1b, AhR2, AhRR1, AIP, ARNT2, ARNT11a, ARNT11b, SP1, AhRRb, CYP1A1, NCOR2, CYP1B1	increase	yes	-	0.02 mg/l	Medium confidence	Genes related to AhR network significantly increased (AhRRb, CYP1A1, NCRO2, CYP1B1)
PPAR activity	Liu et al. 2013a	Zebrafish (AB strain) embryos	Combined	Whole body (116h)	mRNA expression of genes related to the PPARalpha network: DUT, IL8, PPARalpha, PPARgc1a, LPL, IL6, PPARg	increase	yes	0.02 mg/l	0.2 mg/l	Medium confidence	Genes related to PPARalpha network significantly increased (PPARalpha, PPARgc1a, LPL, IL6, PPARg)	Increasing of mRNA expression and nuclear receptor pathway signalling related to PPAR. RXR-dependent pathways affected.	High			abstain (only gene expression data available)	PPAR activity
	Mitchell et al. 2018	Zebrafish (5D strain) embryos	Combined	Whole body (48h)	FXR/PXR/PPARalpha/VDR/LXR to RXR activation ratio	increase	yes	5 µM	10 µM	High confidence	FXR, PXR, PPARalpha, VDR and LCR to RXR activation ratio increased
					Nuclear receptor pathways: PPAR signalling	increase	yes	10 µM	20 µM		PPAR signalling significantly increased
Unspecific tissue effects	Su et al. 2014	Chicken embryonic hepatocytes	liver	36 hours	Cell death	no clear pattern	no	-	-	High confidence							Unspecific tissue effects
	Su et al. 2014	Chicken embryonic hepatocytes	liver	36 hours	Oxidative stress	increase	yes	-	10 µM	High confidence	Significant increase of oxidative stress in chicken embryonic hepatocytes.
non-ED-related neurotoxicity	Gant et al. 1987	Torpedo californica electric organ homogenate	-	60 minutes	[35S] TBPS binding	not-available	not reported	-	IC50 = 10.3 µM								non-ED-related neurotoxicity
	Sun et al. 2016	Japanese Medaka (d-rR) embryos	Combined	Whole body (96h)	Acetylcholinesterase activity (%)
					Nervous system: Gene expression of ache, gap43, alpha1-tubulin, mbp, shha, syn2a, gfap, elavl3
	Hendriks et al. 2012	Xenopus laevis oocytes	-	30 seconds	Human alpha4beta2 nACh receptor antagonism	decrease	yes	0.3 µM	1 µM	Medium confidence	Significant human alpha4beta2 nACh receptor antagonism.
Immune system (non-ED related)	Su et al. 2014	Chicken embryonic hepatocytes	liver	36 hours	Immune function	no clear pattern	no	-	-	High confidence	No clear effects on immune function of chicken hepatocytes						Immune system (non-ED related)
Other metabolism	Su et al. 2014	Chicken embryonic hepatocytes	liver	36 hours	Phase I and II metabolism	no change	no	-	-	High confidence							Other metabolism
